# Supplementary material
Source: PubMed Central journal article supplement (PMC6426632)

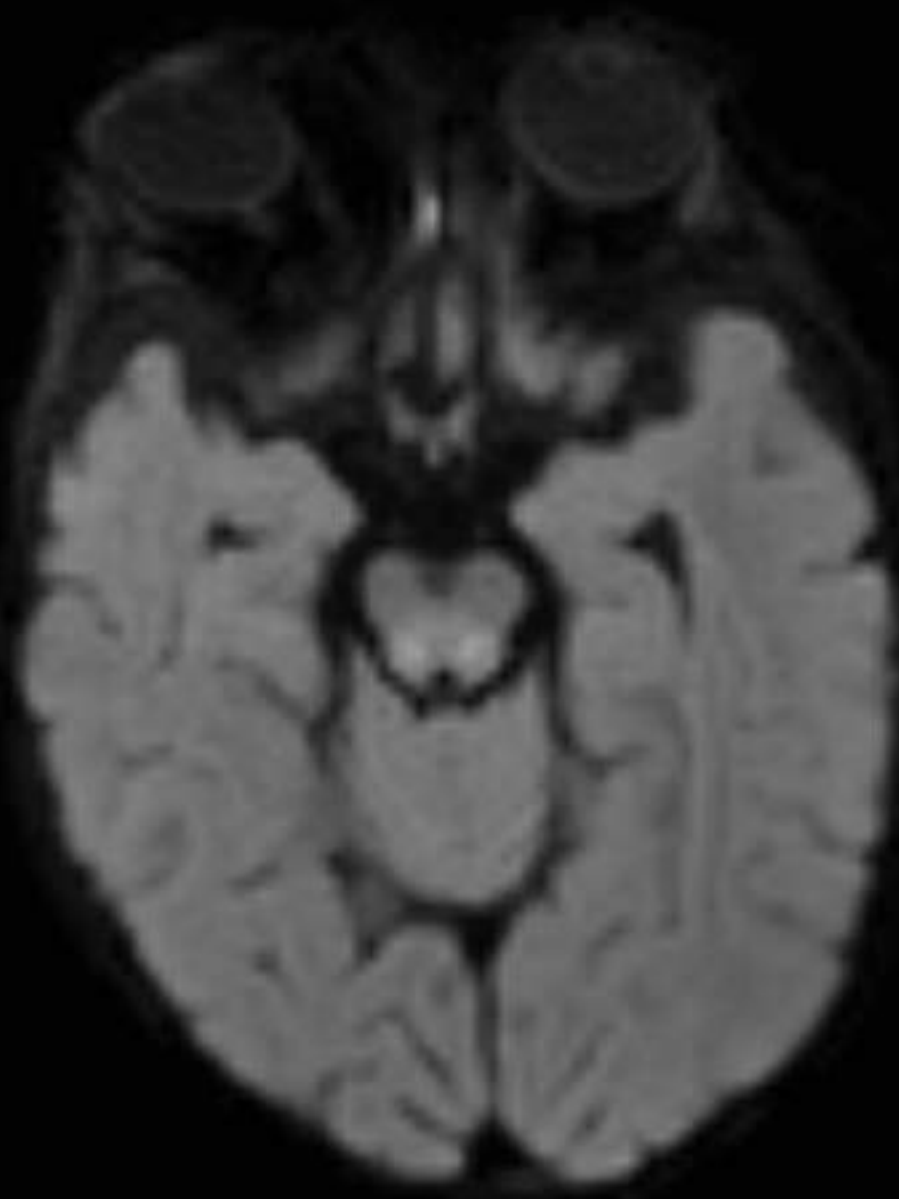

F 7 007M  
Sequence: \*re\_b0  
Slice: 3.5 mm  
TR: 8920  
TE: 64  
0

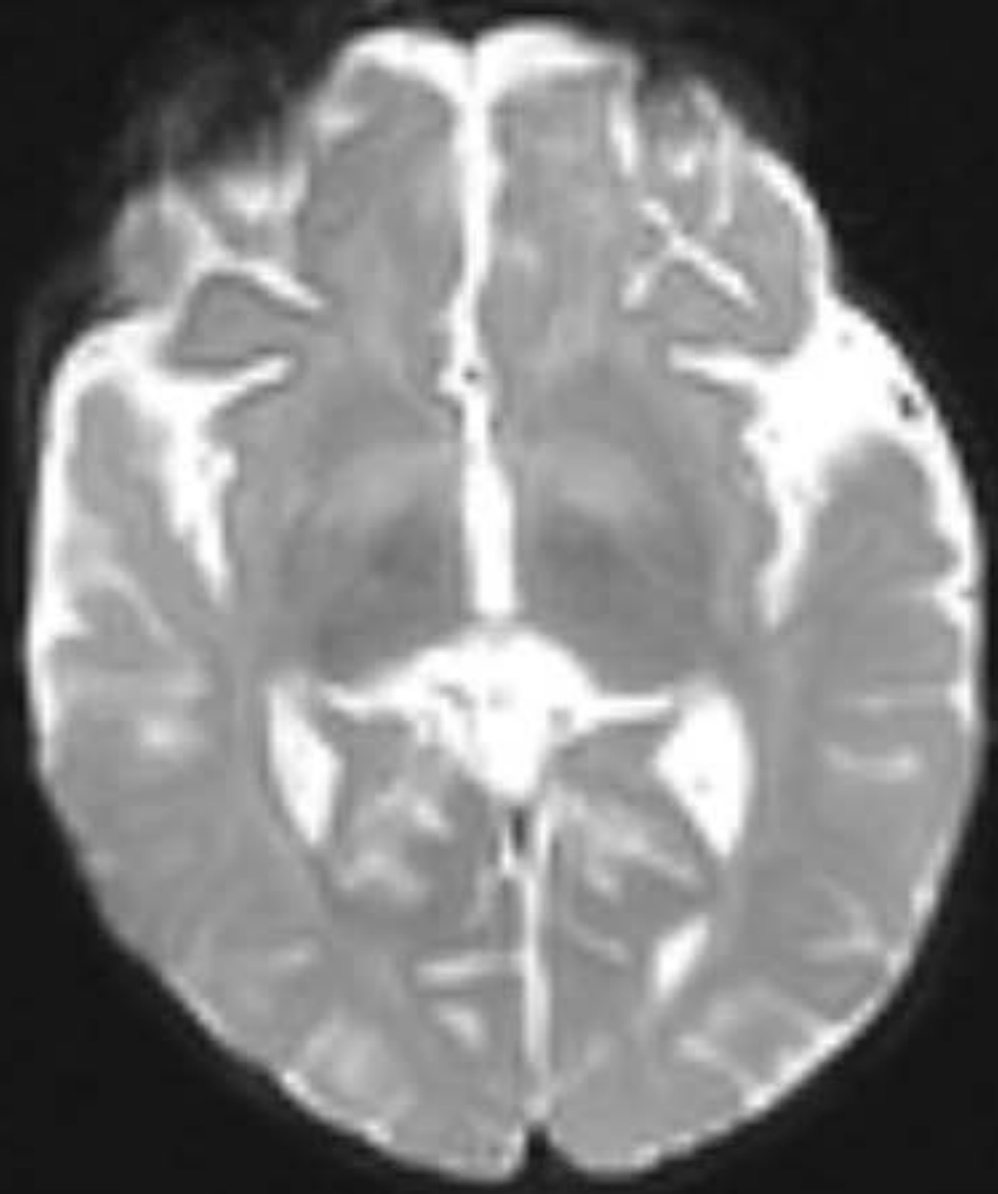

Image no: 17  
FA: 180  
HFS  
Pos:5.1354840209908  
Series: 5  
Image 17 of 70  
**10/21/2016, 22:08:57**

P

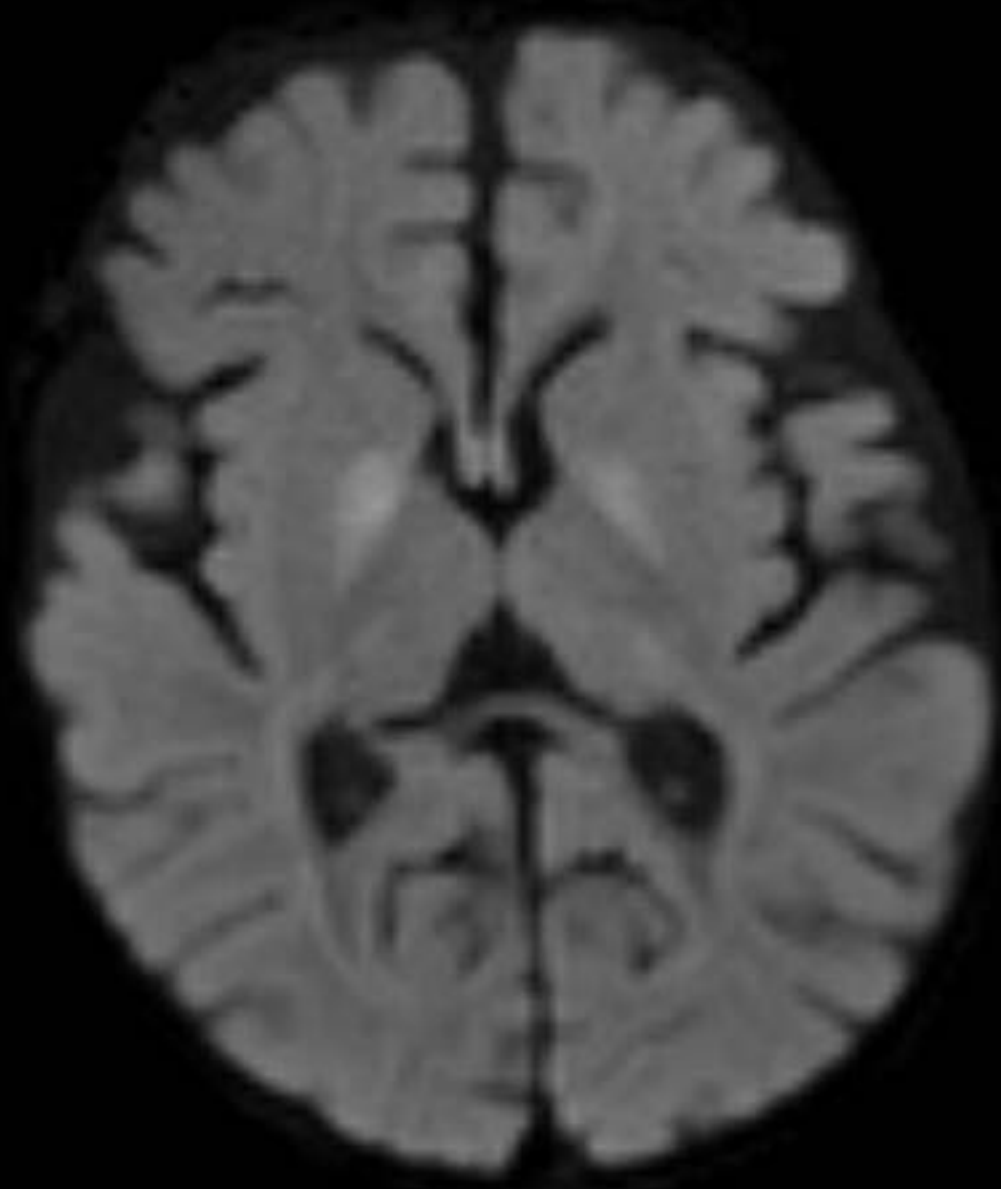

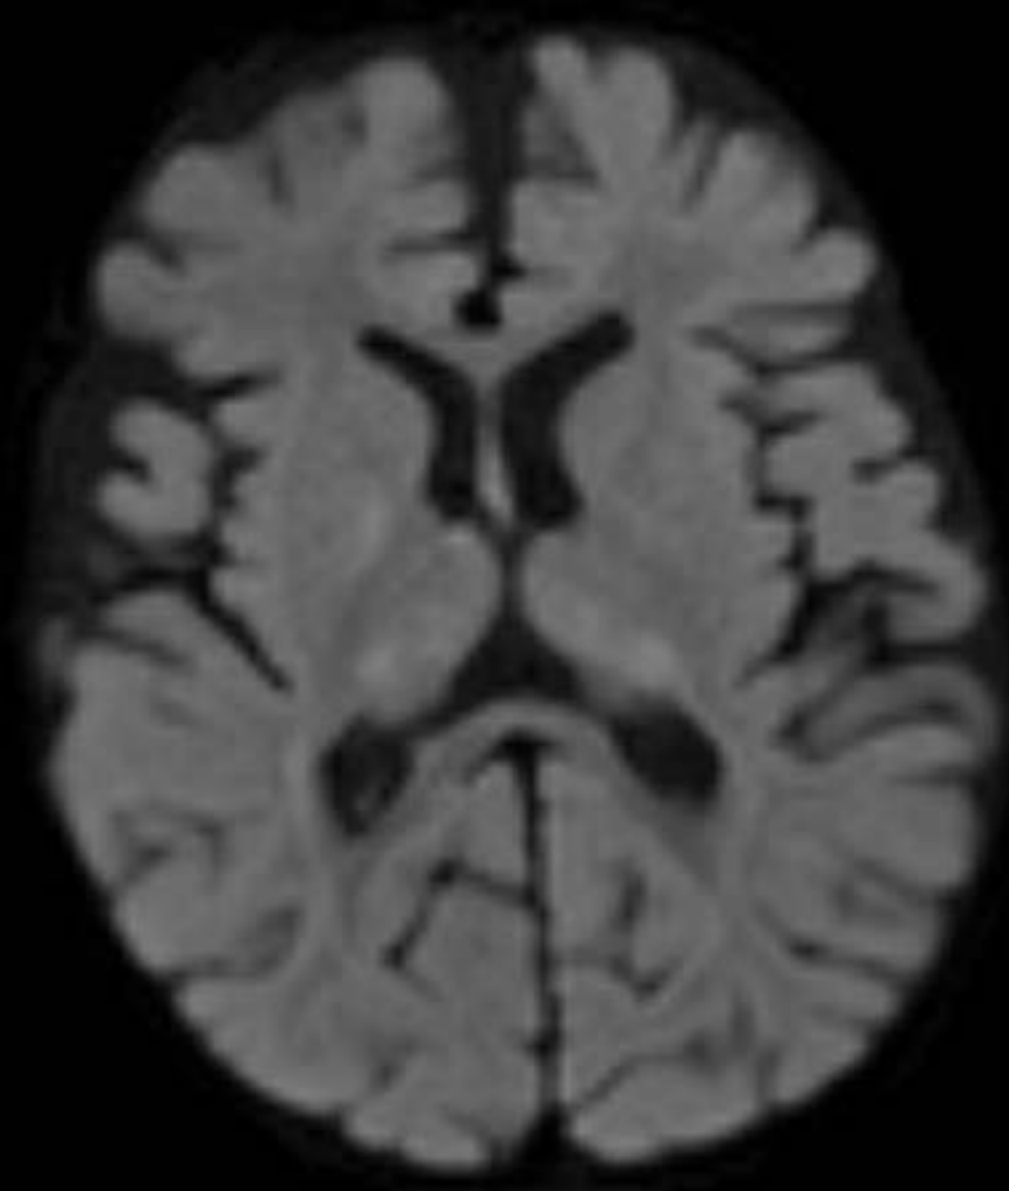

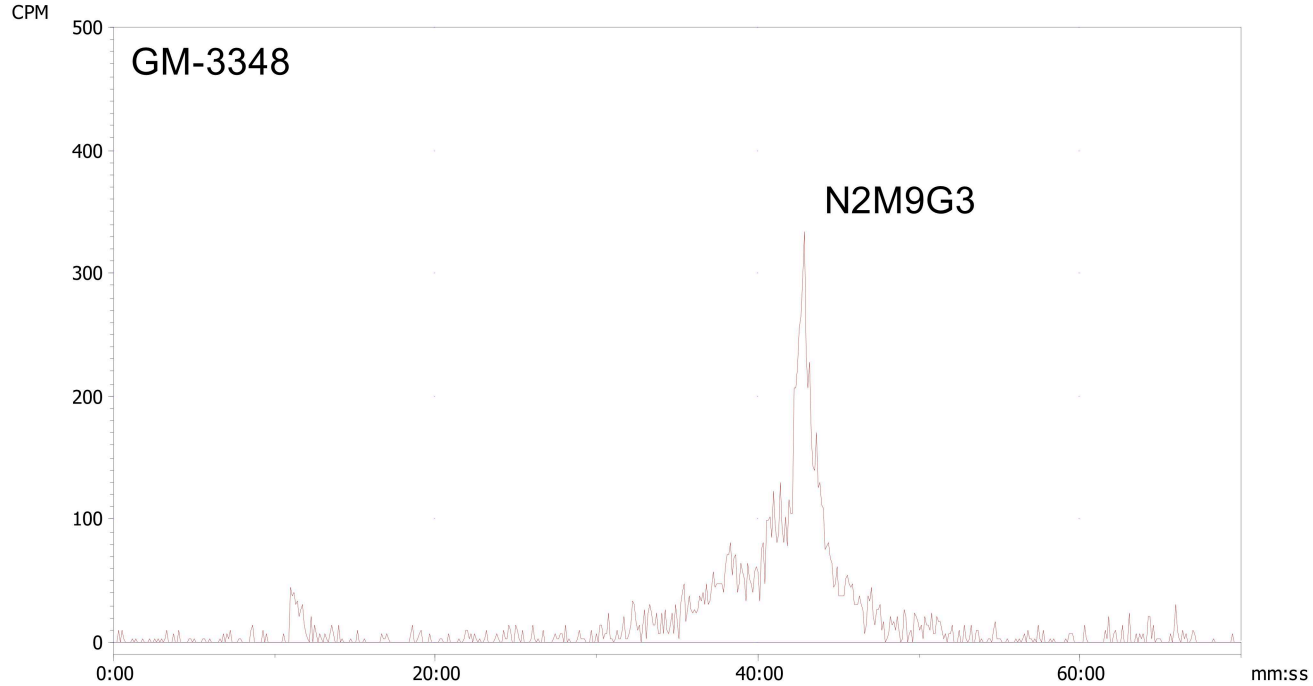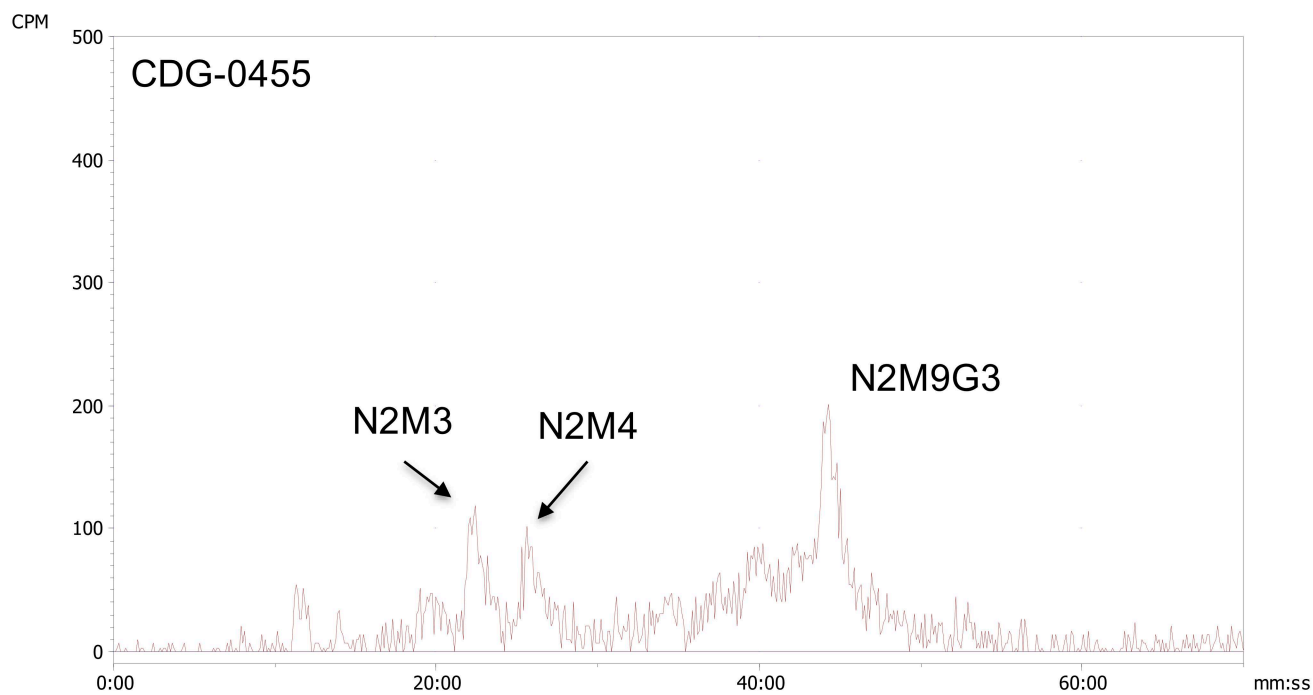

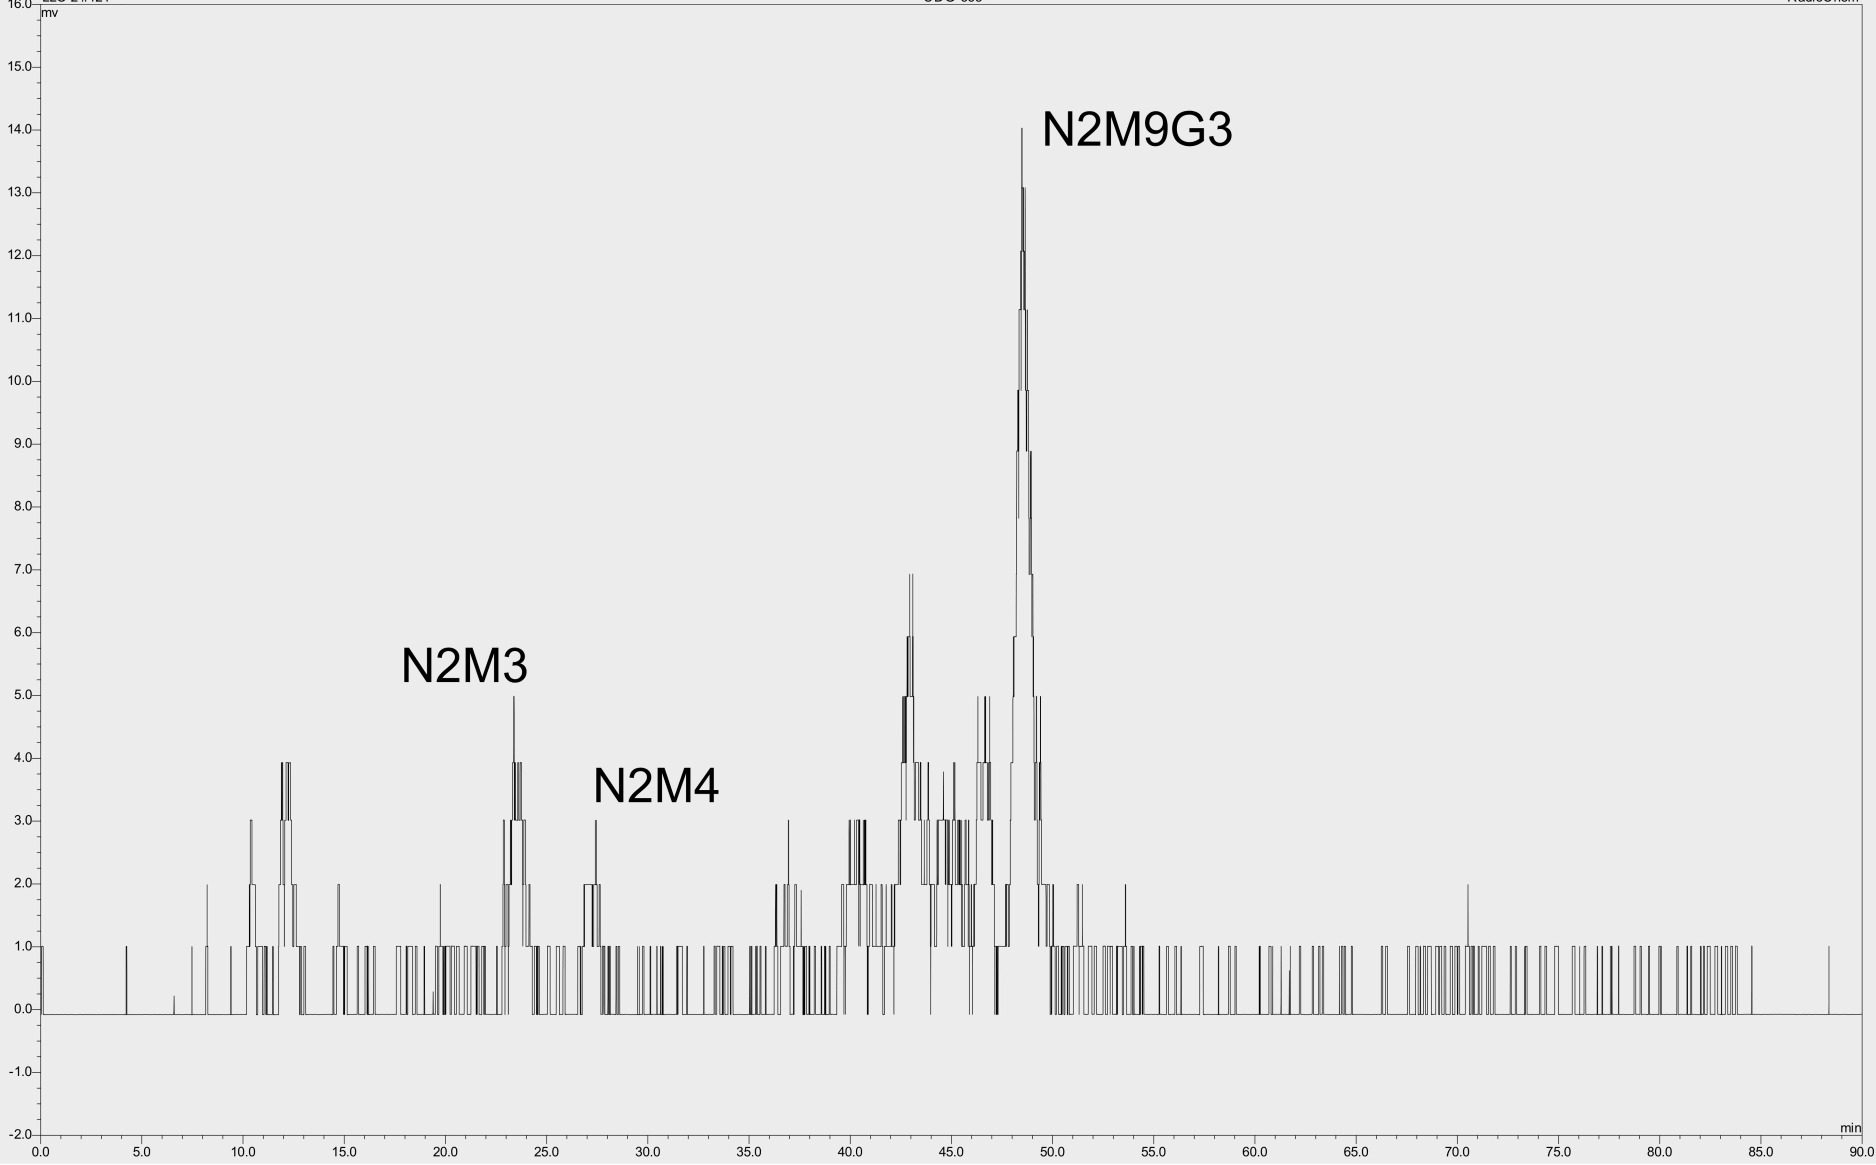

Supplement: NIHMS1013280-supplement-supp_info.pdf [file NIHMS1013280-supplement-supp_info.pdf]
